# Supplementary material for: Constructing a neutrophil extracellular trap model based on machine learning to predict clinical outcomes and immune therapy responses in oral squamous cell carcinoma
Source: Front Genet. 2025 Sep 8;16:1616868. doi: 10.3389/fgene.2025.1616868 (PMC12450687; doi:10.3389/fgene.2025.1616868)
Supplement: Supplementary file 1 [file Table2.xlsx]

## Sheet: GO
ONTOLOGY	ID	Description	GeneRatio	BgRatio	pvalue	p.adjust	qvalue	geneID	Count
BP	GO:0019395	fatty acid oxidation	4/45	107/18870	0.000121735	0.00599146	0.00417854	CRAT/ACADM/ETFDH/ADIPOQ	4
BP	GO:0023061	signal release	7/45	484/18870	0.000136444	0.00617816	0.00430874	IL1A/PFKM/SCT/NNAT/CAMK2A/SYN1/ADIPOQ	7
BP	GO:0070528	protein kinase C signaling	2/45	34/18870	0.00297184	0.035043	0.0244395	ANKRD1/GPD1L	2
BP	GO:0070555	response to interleukin-1	3/45	140/18870	0.00451673	0.04333	0.030219	MAPK13/ANKRD1/TRIM63	3
BP	GO:0007219	Notch signaling pathway	3/45	181/18870	0.00916639	0.0688593	0.0480235	GOT1/PLN/GRIP2	3
BP	GO:0061912	selective autophagy	2/45	96/18870	0.0220029	0.123917	0.0864215	HSPB8/SLC25A4	2
BP	GO:0033500	carbohydrate homeostasis	3/45	252/18870	0.0221165	0.12394	0.0864377	PYGL/PFKM/ADIPOQ	3
BP	GO:0033079	immature T cell proliferation	1/45	13/18870	0.0305714	0.128174	0.0893902	IL1A	1
BP	GO:0008654	phospholipid biosynthetic process	3/45	254/18870	0.0225753	0.125605	0.0875987	TMEM38B/IP6K3/PLA2G4C	3
BP	GO:0097300	programmed necrotic cell death	3/45	60/18870	0.000394352	0.00970448	0.00676805	YBX3/PYGL/SLC25A4	3
CC	GO:1903293	phosphatase complex	2/45	54/19886	0.00664921	0.0724254	0.057023	PPP1R3C/PPP1R3F	2
CC	GO:0030016	myofibril	5/45	236/19886	0.000187194	0.00456513	0.00359428	ACTC1/ANKRD1/CASQ2/TRIM63/SCN3B	5
CC	GO:0030018	Z disc	3/45	132/19886	0.00330943	0.0452289	0.0356102	CASQ2/TRIM63/SCN3B	3
CC	GO:0031430	M band	1/45	22/19886	0.0486436	0.193005	0.15196	TRIM63	1
CC	GO:0031674	I band	5/45	146/19886	1.92071e-05	0.00236247	0.00186005	ACTC1/ANKRD1/CASQ2/TRIM63/SCN3B	5
CC	GO:0016528	sarcoplasm	4/45	93/19886	5.76671e-05	0.00354652	0.0027923	SERPINB5/CASQ2/TMEM38B/PLN	4
CC	GO:0030017	sarcomere	5/45	216/19886	0.000123829	0.00413263	0.00325376	ACTC1/ANKRD1/CASQ2/TRIM63/SCN3B	5
CC	GO:0033017	sarcoplasmic reticulum membrane	3/45	44/19886	0.000134395	0.00413263	0.00325376	CASQ2/TMEM38B/PLN	3
CC	GO:0043292	contractile fiber	5/45	245/19886	0.000222689	0.00456513	0.00359428	ACTC1/ANKRD1/CASQ2/TRIM63/SCN3B	5
CC	GO:0016529	sarcoplasmic reticulum	3/45	75/19886	0.000652471	0.0114648	0.00902667	CASQ2/TMEM38B/PLN	3
MF	GO:0008157	protein phosphatase 1 binding	2/46	25/18496	0.00175038	0.0752662	0.0580388	PPP1R3C/PPP1R3F	2
MF	GO:0002039	p53 binding	2/46	66/18496	0.0117319	0.134526	0.103735	ANKRD1/ZNF385B	2
MF	GO:0008374	O-acyltransferase activity	2/46	55/18496	0.00826379	0.11714	0.090328	CRAT/PLA2G4C	2
MF	GO:0004707	MAP kinase activity	1/46	16/18496	0.0390743	0.173364	0.133683	MAPK13	1
MF	GO:0005149	interleukin-1 receptor binding	1/46	17/18496	0.0414662	0.173364	0.133683	IL1A	1
MF	GO:0019903	protein phosphatase binding	2/46	142/18496	0.0486288	0.173364	0.133683	PPP1R3C/PPP1R3F	2
MF	GO:0030170	pyridoxal phosphate binding	2/46	56/18496	0.00855638	0.11714	0.090328	PYGL/GOT1	2
MF	GO:0016502	nucleotide receptor activity	1/46	20/18496	0.048607	0.173364	0.133683	P2RX6	1
MF	GO:0031432	titin binding	2/46	13/18496	0.000463827	0.053527	0.0412754	ANKRD1/TRIM63	2
MF	GO:0016208	AMP binding	2/46	15/18496	0.000622406	0.053527	0.0412754	PYGL/PFKM	2
BP	GO:0005977	glycogen metabolic process	5/45	76/18870	9.99074e-07	0.000590517	0.000411835	PYGL/PFKM/ACADM/PPP1R3C/PPP1R3F	5
BP	GO:0044042	glucan metabolic process	5/45	78/18870	1.13761e-06	0.000590517	0.000411835	PYGL/PFKM/ACADM/PPP1R3C/PPP1R3F	5
BP	GO:0006936	muscle contraction	8/45	351/18870	1.56497e-06	0.000590517	0.000411835	CASQ2/GPD1L/TMEM38B/TRIM63/PLN/P2RX6/SCN3B/GRIP2	8
BP	GO:0006112	energy reserve metabolic process	5/45	89/18870	2.19364e-06	0.0006208	0.000432955	PYGL/PFKM/ACADM/PPP1R3C/PPP1R3F	5
BP	GO:0005976	polysaccharide metabolic process	5/45	102/18870	4.30189e-06	0.000973948	0.000679246	PYGL/PFKM/ACADM/PPP1R3C/PPP1R3F	5
BP	GO:0003012	muscle system process	8/45	452/18870	1.00859e-05	0.00190288	0.0013271	CASQ2/GPD1L/TMEM38B/TRIM63/PLN/P2RX6/SCN3B/GRIP2	8
BP	GO:0016042	lipid catabolic process	7/45	334/18870	1.30138e-05	0.00195109	0.00136072	CRAT/ACADM/ETFDH/SCT/PLA2G4C/ADIPOQ/CIDEC	7
BP	GO:0015980	energy derivation by oxidation of organic compounds	7/45	337/18870	1.37886e-05	0.00195109	0.00136072	IDH2/PYGL/PFKM/ACADM/PPP1R3C/ETFDH/PPP1R3F	7
BP	GO:0010881	regulation of cardiac muscle contraction by regulation of the release of sequestered calcium ion	3/45	22/18870	1.89072e-05	0.00220198	0.0015357	CASQ2/TMEM38B/PLN	3
BP	GO:0060048	cardiac muscle contraction	5/45	139/18870	1.94522e-05	0.00220198	0.0015357	CASQ2/GPD1L/TMEM38B/PLN/SCN3B	5
BP	GO:0060047	heart contraction	6/45	243/18870	2.29352e-05	0.00236024	0.00164606	ACTC1/CASQ2/GPD1L/TMEM38B/PLN/SCN3B	6
BP	GO:0003015	heart process	6/45	255/18870	3.00695e-05	0.00258235	0.00180097	ACTC1/CASQ2/GPD1L/TMEM38B/PLN/SCN3B	6
BP	GO:0010882	regulation of cardiac muscle contraction by calcium ion signaling	3/45	26/18870	3.1709e-05	0.00258235	0.00180097	CASQ2/TMEM38B/PLN	3
BP	GO:0006635	fatty acid beta-oxidation	4/45	76/18870	3.19372e-05	0.00258235	0.00180097	CRAT/ACADM/ETFDH/ADIPOQ	4
BP	GO:0010880	regulation of release of sequestered calcium ion into cytosol by sarcoplasmic reticulum	3/45	31/18870	5.43646e-05	0.00410272	0.0028613	CASQ2/TMEM38B/PLN	3
BP	GO:0006941	striated muscle contraction	5/45	186/18870	7.82435e-05	0.00553573	0.0038607	CASQ2/GPD1L/TMEM38B/PLN/SCN3B	5
BP	GO:0014808	release of sequestered calcium ion into cytosol by sarcoplasmic reticulum	3/45	36/18870	8.56375e-05	0.00570245	0.00397697	CASQ2/TMEM38B/PLN	3
BP	GO:1903514	release of sequestered calcium ion into cytosol by endoplasmic reticulum	3/45	37/18870	9.30385e-05	0.00585109	0.00408064	CASQ2/TMEM38B/PLN	3
BP	GO:0002027	regulation of heart rate	4/45	102/18870	0.000101117	0.00599146	0.00417854	CASQ2/GPD1L/PLN/SCN3B	4
BP	GO:0043255	regulation of carbohydrate biosynthetic process	4/45	105/18870	0.000113154	0.00599146	0.00417854	ACADM/PPP1R3C/PPP1R3F/ADIPOQ	4
BP	GO:0070252	actin-mediated cell contraction	4/45	105/18870	0.000113154	0.00599146	0.00417854	ACTC1/GPD1L/PLN/SCN3B	4
BP	GO:0008016	regulation of heart contraction	5/45	208/18870	0.000132384	0.00617816	0.00430874	CASQ2/GPD1L/TMEM38B/PLN/SCN3B	5
BP	GO:0009062	fatty acid catabolic process	4/45	106/18870	0.000117387	0.00599146	0.00417854	CRAT/ACADM/ETFDH/ADIPOQ	4
BP	GO:0070296	sarcoplasmic reticulum calcium ion transport	3/45	43/18870	0.000146302	0.00628698	0.00438463	CASQ2/TMEM38B/PLN	3
BP	GO:0016051	carbohydrate biosynthetic process	5/45	214/18870	0.00015121	0.00628698	0.00438463	GOT1/ACADM/PPP1R3C/PPP1R3F/ADIPOQ	5
BP	GO:0034440	lipid oxidation	4/45	114/18870	0.000155508	0.00628698	0.00438463	CRAT/ACADM/ETFDH/ADIPOQ	4
BP	GO:0005978	glycogen biosynthetic process	3/45	46/18870	0.00017906	0.00669039	0.00466597	ACADM/PPP1R3C/PPP1R3F	3
BP	GO:0009250	glucan biosynthetic process	3/45	46/18870	0.00017906	0.00669039	0.00466597	ACADM/PPP1R3C/PPP1R3F	3
BP	GO:0044242	cellular lipid catabolic process	5/45	223/18870	0.000183217	0.00669039	0.00466597	CRAT/ACADM/ETFDH/PLA2G4C/ADIPOQ	5
BP	GO:0070266	necroptotic process	3/45	49/18870	0.000216243	0.00764959	0.00533494	YBX3/PYGL/SLC25A4	3
BP	GO:0044282	small molecule catabolic process	6/45	375/18870	0.000250453	0.00859128	0.00599169	GOT1/CRAT/PFKM/ACADM/ETFDH/ADIPOQ	6
BP	GO:0072329	monocarboxylic acid catabolic process	4/45	131/18870	0.00026512	0.00882695	0.00615605	CRAT/ACADM/ETFDH/ADIPOQ	4
BP	GO:0030048	actin filament-based movement	4/45	133/18870	0.000280908	0.00908536	0.00633626	ACTC1/GPD1L/PLN/SCN3B	4
BP	GO:0071313	cellular response to caffeine	2/45	11/18870	0.000301695	0.00948662	0.00661611	CASQ2/TMEM38B	2
BP	GO:0016054	organic acid catabolic process	5/45	252/18870	0.000322466	0.0096061	0.00669943	GOT1/CRAT/ACADM/ETFDH/ADIPOQ	5
BP	GO:0046395	carboxylic acid catabolic process	5/45	252/18870	0.000322466	0.0096061	0.00669943	GOT1/CRAT/ACADM/ETFDH/ADIPOQ	5
BP	GO:0010959	regulation of metal ion transport	6/45	398/18870	0.000344424	0.00970448	0.00676805	CASQ2/GPD1L/TMEM38B/PLN/CAMK2A/SCN3B	6
BP	GO:1903522	regulation of blood circulation	5/45	258/18870	0.000359242	0.00970448	0.00676805	CASQ2/GPD1L/TMEM38B/PLN/SCN3B	5
BP	GO:0009437	carnitine metabolic process	2/45	12/18870	0.000361484	0.00970448	0.00676805	CRAT/ACADM	2
BP	GO:0033539	fatty acid beta-oxidation using acyl-CoA dehydrogenase	2/45	12/18870	0.000361484	0.00970448	0.00676805	ACADM/ETFDH	2
BP	GO:0014074	response to purine-containing compound	4/45	143/18870	0.000370143	0.00970448	0.00676805	CASQ2/TMEM38B/ADIPOQ/P2RX6	4
BP	GO:0050714	positive regulation of protein secretion	4/45	144/18870	0.000380059	0.00970448	0.00676805	IL1A/ANKRD1/PFKM/NNAT	4
BP	GO:0032387	negative regulation of intracellular transport	3/45	60/18870	0.000394352	0.00970448	0.00676805	PKIA/PLN/ADIPOQ	3
BP	GO:0032409	regulation of transporter activity	5/45	271/18870	0.000449769	0.0108327	0.00755491	CASQ2/GPD1L/PLN/ADIPOQ/SCN3B	5
BP	GO:0071415	cellular response to purine-containing compound	2/45	14/18870	0.000496899	0.0117185	0.00817268	CASQ2/TMEM38B	2
BP	GO:0000271	polysaccharide biosynthetic process	3/45	66/18870	0.0005221	0.0120616	0.00841193	ACADM/PPP1R3C/PPP1R3F	3
BP	GO:0031000	response to caffeine	2/45	15/18870	0.000572476	0.0124624	0.00869143	CASQ2/TMEM38B	2
BP	GO:0051791	medium-chain fatty acid metabolic process	2/45	15/18870	0.000572476	0.0124624	0.00869143	CRAT/ACADM	2
BP	GO:2000479	regulation of cAMP-dependent protein kinase activity	2/45	15/18870	0.000572476	0.0124624	0.00869143	PKIA/ADIPOQ	2
BP	GO:1903532	positive regulation of secretion by cell	5/45	288/18870	0.000592975	0.0126651	0.0088328	IL1A/ANKRD1/PFKM/SCT/NNAT	5
BP	GO:0006103	2-oxoglutarate metabolic process	2/45	16/18870	0.000653266	0.0134454	0.00937702	IDH2/GOT1	2
BP	GO:0006577	amino-acid betaine metabolic process	2/45	16/18870	0.000653266	0.0134454	0.00937702	CRAT/ACADM	2
BP	GO:0086003	cardiac muscle cell contraction	3/45	76/18870	0.000788862	0.0159322	0.0111114	GPD1L/PLN/SCN3B	3
BP	GO:0051047	positive regulation of secretion	5/45	310/18870	0.000826251	0.0159322	0.0111114	IL1A/ANKRD1/PFKM/SCT/NNAT	5
BP	GO:0005980	glycogen catabolic process	2/45	18/18870	0.000830391	0.0159322	0.0111114	PYGL/PFKM	2
BP	GO:0035234	ectopic germ cell programmed cell death	2/45	18/18870	0.000830391	0.0159322	0.0111114	YBX3/IL1A	2
BP	GO:0055117	regulation of cardiac muscle contraction	3/45	78/18870	0.000850844	0.0160526	0.0111953	CASQ2/TMEM38B/PLN	3
BP	GO:1904062	regulation of monoatomic cation transmembrane transport	5/45	315/18870	0.00088767	0.0164728	0.0114884	CASQ2/GPD1L/TMEM38B/PLN/SCN3B	5
BP	GO:0009251	glucan catabolic process	2/45	19/18870	0.000926677	0.0169193	0.0117998	PYGL/PFKM	2
BP	GO:0051279	regulation of release of sequestered calcium ion into cytosol	3/45	83/18870	0.00101911	0.0182774	0.0127469	CASQ2/TMEM38B/PLN	3
BP	GO:0006109	regulation of carbohydrate metabolic process	4/45	188/18870	0.00103335	0.0182774	0.0127469	ACADM/PPP1R3C/PPP1R3F/ADIPOQ	4
BP	GO:0030258	lipid modification	4/45	192/18870	0.00111714	0.0192409	0.0134189	CRAT/ACADM/ETFDH/ADIPOQ	4
BP	GO:0000272	polysaccharide catabolic process	2/45	21/18870	0.00113458	0.0192409	0.0134189	PYGL/PFKM	2
BP	GO:0006006	glucose metabolic process	4/45	193/18870	0.00113882	0.0192409	0.0134189	GOT1/PFKM/ACADM/ADIPOQ	4
BP	GO:0060546	negative regulation of necroptotic process	2/45	22/18870	0.00124615	0.0207447	0.0144676	YBX3/SLC25A4	2
BP	GO:0006094	gluconeogenesis	3/45	90/18870	0.00128798	0.0211303	0.0147366	GOT1/ACADM/ADIPOQ	3
BP	GO:0062099	negative regulation of programmed necrotic cell death	2/45	23/18870	0.00136276	0.0220377	0.0153695	YBX3/SLC25A4	2
BP	GO:0019319	hexose biosynthetic process	3/45	93/18870	0.0014156	0.0222919	0.0155467	GOT1/ACADM/ADIPOQ	3
BP	GO:0051235	maintenance of location	5/45	350/18870	0.00141786	0.0222919	0.0155467	CASQ2/TMEM38B/PLN/PLA2G4C/CIDEC	5
BP	GO:0043648	dicarboxylic acid metabolic process	3/45	94/18870	0.00145985	0.0226376	0.0157878	IDH2/GOT1/DGLUCY	3
BP	GO:0046716	muscle cell cellular homeostasis	2/45	24/18870	0.00148439	0.0227072	0.0158363	PFKM/PLN	2
BP	GO:0061337	cardiac conduction	3/45	97/18870	0.00159776	0.0239958	0.0167351	CASQ2/PLN/SCN3B	3
BP	GO:0010623	programmed cell death involved in cell development	2/45	25/18870	0.00161103	0.0239958	0.0167351	YBX3/IL1A	2
BP	GO:0006942	regulation of striated muscle contraction	3/45	99/18870	0.00169409	0.0249054	0.0173694	CASQ2/TMEM38B/PLN	3
BP	GO:1902074	response to salt	5/45	366/18870	0.00172584	0.0250468	0.017468	IL1A/MAPK13/CASQ2/ADIPOQ/P2RX6	5
BP	GO:0046364	monosaccharide biosynthetic process	3/45	102/18870	0.00184529	0.0264413	0.0184406	GOT1/ACADM/ADIPOQ	3
BP	GO:0032412	regulation of monoatomic ion transmembrane transporter activity	4/45	231/18870	0.00219987	0.0311281	0.0217092	CASQ2/GPD1L/PLN/SCN3B	4
BP	GO:0090277	positive regulation of peptide hormone secretion	3/45	109/18870	0.00223015	0.031167	0.0217364	PFKM/SCT/NNAT	3
BP	GO:0019318	hexose metabolic process	4/45	233/18870	0.00226971	0.031333	0.0218521	GOT1/PFKM/ACADM/ADIPOQ	4
BP	GO:0002793	positive regulation of peptide secretion	3/45	111/18870	0.00234856	0.032031	0.0223389	PFKM/SCT/NNAT	3
BP	GO:0005979	regulation of glycogen biosynthetic process	2/45	31/18870	0.0024745	0.0327544	0.0228434	PPP1R3C/PPP1R3F	2
BP	GO:0010962	regulation of glucan biosynthetic process	2/45	31/18870	0.0024745	0.0327544	0.0228434	PPP1R3C/PPP1R3F	2
BP	GO:0022898	regulation of transmembrane transporter activity	4/45	239/18870	0.00248841	0.0327544	0.0228434	CASQ2/GPD1L/PLN/SCN3B	4
BP	GO:0006631	fatty acid metabolic process	5/45	401/18870	0.00256793	0.0334127	0.0233025	CRAT/ACADM/ETFDH/PLA2G4C/ADIPOQ	5
BP	GO:0010765	positive regulation of sodium ion transport	2/45	32/18870	0.00263548	0.0335209	0.023378	GPD1L/SCN3B	2
BP	GO:1901020	negative regulation of calcium ion transmembrane transporter activity	2/45	32/18870	0.00263548	0.0335209	0.023378	CASQ2/PLN	2
BP	GO:0006536	glutamate metabolic process	2/45	33/18870	0.00280127	0.0344775	0.0240451	GOT1/DGLUCY	2
BP	GO:0048738	cardiac muscle tissue development	4/45	247/18870	0.00280206	0.0344775	0.0240451	ACTC1/ANKRD1/ACADM/PLN	4
BP	GO:0090257	regulation of muscle system process	4/45	247/18870	0.00280206	0.0344775	0.0240451	CASQ2/TMEM38B/TRIM63/PLN	4
BP	GO:0046883	regulation of hormone secretion	4/45	251/18870	0.00296863	0.035043	0.0244395	PFKM/SCT/NNAT/ADIPOQ	4
BP	GO:0051924	regulation of calcium ion transport	4/45	251/18870	0.00296863	0.035043	0.0244395	CASQ2/TMEM38B/PLN/CAMK2A	4
BP	GO:0086019	cell-cell signaling involved in cardiac conduction	2/45	34/18870	0.00297184	0.035043	0.0244395	CASQ2/SCN3B	2
BP	GO:0034389	lipid droplet organization	2/45	35/18870	0.00314719	0.0359861	0.0250972	PLA2G4C/CIDEC	2
BP	GO:0060544	regulation of necroptotic process	2/45	35/18870	0.00314719	0.0359861	0.0250972	YBX3/SLC25A4	2
BP	GO:0086005	ventricular cardiac muscle cell action potential	2/45	35/18870	0.00314719	0.0359861	0.0250972	GPD1L/SCN3B	2
BP	GO:0005996	monosaccharide metabolic process	4/45	261/18870	0.00341453	0.0377662	0.0263387	GOT1/PFKM/ACADM/ADIPOQ	4
BP	GO:0051384	response to glucocorticoid	3/45	127/18870	0.0034374	0.0377662	0.0263387	GOT1/TRIM63/ADIPOQ	3
BP	GO:0046326	positive regulation of glucose import	2/45	37/18870	0.0035121	0.0377662	0.0263387	CLTCL1/ADIPOQ	2
BP	GO:0071312	cellular response to alkaloid	2/45	37/18870	0.0035121	0.0377662	0.0263387	CASQ2/TMEM38B	2
BP	GO:2000279	negative regulation of DNA biosynthetic process	2/45	37/18870	0.0035121	0.0377662	0.0263387	ANKRD1/ADIPOQ	2
BP	GO:0010927	cellular component assembly involved in morphogenesis	3/45	128/18870	0.00351408	0.0377662	0.0263387	ACTC1/ANKRD1/PLN	3
BP	GO:0014706	striated muscle tissue development	4/45	264/18870	0.00355674	0.0377662	0.0263387	ACTC1/ANKRD1/ACADM/PLN	4
BP	GO:0060537	muscle tissue development	5/45	433/18870	0.00356977	0.0377662	0.0263387	YBX3/ACTC1/ANKRD1/ACADM/PLN	5
BP	GO:0050708	regulation of protein secretion	4/45	266/18870	0.00365375	0.0382967	0.0267087	IL1A/ANKRD1/PFKM/NNAT	4
BP	GO:0070873	regulation of glycogen metabolic process	2/45	38/18870	0.00370161	0.0384424	0.0268103	PPP1R3C/PPP1R3F	2
BP	GO:0042391	regulation of membrane potential	5/45	440/18870	0.00382186	0.0393304	0.0274296	CASQ2/GPD1L/PLN/P2RX6/SCN3B	5
BP	GO:0032885	regulation of polysaccharide biosynthetic process	2/45	39/18870	0.0038958	0.0397302	0.0277084	PPP1R3C/PPP1R3F	2
BP	GO:0006816	calcium ion transport	5/45	445/18870	0.0040096	0.0405256	0.0282632	CASQ2/TMEM38B/PLN/CAMK2A/P2RX6	5
BP	GO:0062098	regulation of programmed necrotic cell death	2/45	40/18870	0.00409465	0.041019	0.0286072	YBX3/SLC25A4	2
BP	GO:0051209	release of sequestered calcium ion into cytosol	3/45	136/18870	0.00416537	0.0413614	0.028846	CASQ2/TMEM38B/PLN	3
BP	GO:0051283	negative regulation of sequestering of calcium ion	3/45	137/18870	0.00425158	0.0418504	0.0291871	CASQ2/TMEM38B/PLN	3
BP	GO:0034765	regulation of monoatomic ion transmembrane transport	5/45	454/18870	0.00436413	0.0425879	0.0297014	CASQ2/GPD1L/TMEM38B/PLN/SCN3B	5
BP	GO:0051282	regulation of sequestering of calcium ion	3/45	139/18870	0.00442726	0.0428347	0.0298735	CASQ2/TMEM38B/PLN	3
BP	GO:0046887	positive regulation of hormone secretion	3/45	141/18870	0.00460729	0.0438273	0.0305658	PFKM/SCT/NNAT	3
BP	GO:0090317	negative regulation of intracellular protein transport	2/45	43/18870	0.0047189	0.0445149	0.0310454	PKIA/ADIPOQ	2
BP	GO:0051208	sequestering of calcium ion	3/45	143/18870	0.00479171	0.0448282	0.0312639	CASQ2/TMEM38B/PLN	3
BP	GO:0010828	positive regulation of glucose transmembrane transport	2/45	44/18870	0.00493614	0.0456831	0.0318601	CLTCL1/ADIPOQ	2
BP	GO:0045834	positive regulation of lipid metabolic process	3/45	145/18870	0.00498055	0.0456831	0.0318601	IL1A/SCT/ADIPOQ	3
BP	GO:0051051	negative regulation of transport	5/45	469/18870	0.00500415	0.0456831	0.0318601	CASQ2/PKIA/SCT/PLN/ADIPOQ	5
BP	GO:1903829	positive regulation of protein localization	5/45	476/18870	0.00532465	0.0479919	0.0334702	IL1A/ANKRD1/PFKM/GPD1L/NNAT	5
BP	GO:0031960	response to corticosteroid	3/45	149/18870	0.0053716	0.0479919	0.0334702	GOT1/TRIM63/ADIPOQ	3
BP	GO:0032881	regulation of polysaccharide metabolic process	2/45	46/18870	0.00538424	0.0479919	0.0334702	PPP1R3C/PPP1R3F	2
BP	GO:0043086	negative regulation of catalytic activity	5/45	480/18870	0.00551422	0.0487664	0.0340104	SERPINB5/PKIA/PLN/CAMK2A/ADIPOQ	5
BP	GO:0003254	regulation of membrane depolarization	2/45	47/18870	0.00561506	0.0492732	0.0343639	GPD1L/SCN3B	2
BP	GO:0048608	reproductive structure development	4/45	305/18870	0.00592224	0.051569	0.035965	SERPINB5/YBX3/IL1A/ASB1	4
BP	GO:1902108	regulation of mitochondrial membrane permeability involved in apoptotic process	2/45	49/18870	0.0060901	0.0517692	0.0361046	SLC25A4/CAMK2A	2
BP	GO:1903170	negative regulation of calcium ion transmembrane transport	2/45	49/18870	0.0060901	0.0517692	0.0361046	CASQ2/PLN	2
BP	GO:0046879	hormone secretion	4/45	308/18870	0.00612816	0.0517692	0.0361046	PFKM/SCT/NNAT/ADIPOQ	4
BP	GO:0051222	positive regulation of protein transport	4/45	308/18870	0.00612816	0.0517692	0.0361046	IL1A/ANKRD1/PFKM/NNAT	4
BP	GO:0061458	reproductive system development	4/45	309/18870	0.00619785	0.0519701	0.0362447	SERPINB5/YBX3/IL1A/ASB1	4
BP	GO:0019932	second-messenger-mediated signaling	4/45	310/18870	0.00626806	0.0521724	0.0363858	CASQ2/TMEM38B/SCT/PLN	4
BP	GO:2000649	regulation of sodium ion transmembrane transporter activity	2/45	50/18870	0.00633428	0.0523388	0.0365018	GPD1L/SCN3B	2
BP	GO:0009914	hormone transport	4/45	319/18870	0.00692405	0.0567973	0.0396113	PFKM/SCT/NNAT/ADIPOQ	4
BP	GO:0006111	regulation of gluconeogenesis	2/45	53/18870	0.00709324	0.0573539	0.0399995	ACADM/ADIPOQ	2
BP	GO:0086002	cardiac muscle cell action potential involved in contraction	2/45	53/18870	0.00709324	0.0573539	0.0399995	GPD1L/SCN3B	2
BP	GO:1904951	positive regulation of establishment of protein localization	4/45	324/18870	0.00730749	0.0586672	0.0409154	IL1A/ANKRD1/PFKM/NNAT	4
BP	GO:1990845	adaptive thermogenesis	3/45	168/18870	0.00747897	0.0596211	0.0415807	SLC25A4/SCT/ADIPOQ	3
BP	GO:0006937	regulation of muscle contraction	3/45	170/18870	0.00772537	0.0611547	0.0426502	CASQ2/TMEM38B/PLN	3
BP	GO:0046661	male sex differentiation	3/45	174/18870	0.00823251	0.0642703	0.0448231	YBX3/IL1A/ASB1	3
BP	GO:1903169	regulation of calcium ion transmembrane transport	3/45	174/18870	0.00823251	0.0642703	0.0448231	CASQ2/TMEM38B/PLN	3
BP	GO:0086065	cell communication involved in cardiac conduction	2/45	58/18870	0.00844487	0.0654767	0.0456644	CASQ2/SCN3B	2
BP	GO:0019216	regulation of lipid metabolic process	4/45	342/18870	0.00880387	0.0677958	0.0472818	IL1A/SCT/ADIPOQ/CIDEC	4
BP	GO:0046324	regulation of glucose import	2/45	60/18870	0.00901539	0.0684927	0.0477679	CLTCL1/ADIPOQ	2
BP	GO:1902305	regulation of sodium ion transmembrane transport	2/45	60/18870	0.00901539	0.0684927	0.0477679	GPD1L/SCN3B	2
BP	GO:0046902	regulation of mitochondrial membrane permeability	2/45	61/18870	0.00930696	0.0688593	0.0480235	SLC25A4/CAMK2A	2
BP	GO:0050994	regulation of lipid catabolic process	2/45	61/18870	0.00930696	0.0688593	0.0480235	SCT/CIDEC	2
BP	GO:0055008	cardiac muscle tissue morphogenesis	2/45	61/18870	0.00930696	0.0688593	0.0480235	ACTC1/ANKRD1	2
BP	GO:0070588	calcium ion transmembrane transport	4/45	352/18870	0.00971612	0.0714198	0.0498092	CASQ2/TMEM38B/PLN/P2RX6	4
BP	GO:0046173	polyol biosynthetic process	2/45	63/18870	0.00990262	0.0723211	0.0504378	GOT1/IP6K3	2
BP	GO:0071466	cellular response to xenobiotic stimulus	3/45	192/18870	0.010755	0.0780425	0.054428	RNF149/ANKRD1/ADIPOQ	3
BP	GO:0090276	regulation of peptide hormone secretion	3/45	195/18870	0.0112142	0.0808566	0.0563906	PFKM/SCT/NNAT	3
BP	GO:0009306	protein secretion	4/45	368/18870	0.0113006	0.0809635	0.0564652	IL1A/ANKRD1/PFKM/NNAT	4
BP	GO:0035592	establishment of protein localization to extracellular region	4/45	369/18870	0.0114048	0.081107	0.0565652	IL1A/ANKRD1/PFKM/NNAT	4
BP	GO:0051926	negative regulation of calcium ion transport	2/45	68/18870	0.0114639	0.081107	0.0565652	CASQ2/PLN	2
BP	GO:0002791	regulation of peptide secretion	3/45	198/18870	0.0116847	0.0821557	0.0572966	PFKM/SCT/NNAT	3
BP	GO:0006066	alcohol metabolic process	4/45	373/18870	0.011828	0.0826499	0.0576413	IDH2/GOT1/IP6K3/ADH1B	4
BP	GO:0090087	regulation of peptide transport	3/45	200/18870	0.0120046	0.0833694	0.058143	PFKM/SCT/NNAT	3
BP	GO:0071692	protein localization to extracellular region	4/45	377/18870	0.0122612	0.0846323	0.0590238	IL1A/ANKRD1/PFKM/NNAT	4
BP	GO:0030239	myofibril assembly	2/45	71/18870	0.0124493	0.0854096	0.0595659	ACTC1/ANKRD1	2
BP	GO:0097553	calcium ion transmembrane import into cytosol	3/45	205/18870	0.0128264	0.0874669	0.0610007	CASQ2/TMEM38B/PLN	3
BP	GO:0032413	negative regulation of ion transmembrane transporter activity	2/45	73/18870	0.0131261	0.088445	0.0616829	CASQ2/PLN	2
BP	GO:0055002	striated muscle cell development	2/45	73/18870	0.0131261	0.088445	0.0616829	ACTC1/ANKRD1	2
BP	GO:0060415	muscle tissue morphogenesis	2/45	74/18870	0.0134705	0.0902282	0.0629265	ACTC1/ANKRD1	2
BP	GO:0019722	calcium-mediated signaling	3/45	210/18870	0.0136799	0.0909465	0.0634274	CASQ2/TMEM38B/PLN	3
BP	GO:0016239	positive regulation of macroautophagy	2/45	75/18870	0.0138187	0.0909465	0.0634274	HSPB8/SLC25A4	2
BP	GO:0090559	regulation of membrane permeability	2/45	75/18870	0.0138187	0.0909465	0.0634274	SLC25A4/CAMK2A	2
BP	GO:0086001	cardiac muscle cell action potential	2/45	76/18870	0.0141709	0.0921922	0.0642962	GPD1L/SCN3B	2
BP	GO:2000242	negative regulation of reproductive process	2/45	76/18870	0.0141709	0.0921922	0.0642962	YBX3/IL1A	2
BP	GO:0043270	positive regulation of monoatomic ion transport	3/45	214/18870	0.0143855	0.0930536	0.064897	GPD1L/CAMK2A/SCN3B	3
BP	GO:0046323	glucose import	2/45	77/18870	0.0145269	0.0934345	0.0651626	CLTCL1/ADIPOQ	2
BP	GO:0010827	regulation of glucose transmembrane transport	2/45	78/18870	0.0148868	0.0950816	0.0663113	CLTCL1/ADIPOQ	2
BP	GO:0006979	response to oxidative stress	4/45	400/18870	0.014951	0.0950816	0.0663113	IL1A/MAPK13/ETFDH/ADIPOQ	4
BP	GO:0009064	glutamine family amino acid metabolic process	2/45	79/18870	0.0152505	0.0953791	0.0665188	GOT1/DGLUCY	2
BP	GO:0019362	pyridine nucleotide metabolic process	2/45	79/18870	0.0152505	0.0953791	0.0665188	IDH2/GPD1L	2
BP	GO:0046496	nicotinamide nucleotide metabolic process	2/45	79/18870	0.0152505	0.0953791	0.0665188	IDH2/GPD1L	2
BP	GO:0051899	membrane depolarization	2/45	80/18870	0.0156181	0.0971412	0.0677477	GPD1L/SCN3B	2
BP	GO:0006970	response to osmotic stress	2/45	81/18870	0.0159895	0.0978382	0.0682338	YBX3/MAPK13	2
BP	GO:0048644	muscle organ morphogenesis	2/45	81/18870	0.0159895	0.0978382	0.0682338	ACTC1/ANKRD1	2
BP	GO:1901019	regulation of calcium ion transmembrane transporter activity	2/45	81/18870	0.0159895	0.0978382	0.0682338	CASQ2/PLN	2
BP	GO:0046928	regulation of neurotransmitter secretion	2/45	82/18870	0.0163646	0.0995953	0.0694593	CAMK2A/SYN1	2
BP	GO:0032024	positive regulation of insulin secretion	2/45	84/18870	0.0171261	0.103673	0.0723029	PFKM/NNAT	2
BP	GO:0009743	response to carbohydrate	3/45	230/18870	0.0174131	0.104338	0.0727667	IL1A/MAPK13/ADIPOQ	3
BP	GO:0002028	regulation of sodium ion transport	2/45	85/18870	0.0175125	0.104338	0.0727667	GPD1L/SCN3B	2
BP	GO:0072524	pyridine-containing compound metabolic process	2/45	85/18870	0.0175125	0.104338	0.0727667	IDH2/GPD1L	2
BP	GO:0032370	positive regulation of lipid transport	2/45	86/18870	0.0179026	0.106103	0.073998	IL1A/ADIPOQ	2
BP	GO:0051651	maintenance of location in cell	3/45	237/18870	0.0188415	0.111086	0.0774732	CASQ2/TMEM38B/PLN	3
BP	GO:0071356	cellular response to tumor necrosis factor	3/45	238/18870	0.0190507	0.111738	0.0779277	YBX3/ANKRD1/ADIPOQ	3
BP	GO:0030072	peptide hormone secretion	3/45	241/18870	0.0196862	0.11487	0.0801122	PFKM/SCT/NNAT	3
BP	GO:2001234	negative regulation of apoptotic signaling pathway	3/45	243/18870	0.0201164	0.116778	0.0814429	YBX3/IL1A/SLC25A4	3
BP	GO:1904063	negative regulation of cation transmembrane transport	2/45	92/18870	0.0203198	0.117357	0.0818465	CASQ2/PLN	2
BP	GO:0043279	response to alkaloid	2/45	93/18870	0.0207352	0.118754	0.0828205	CASQ2/TMEM38B	2
BP	GO:0002790	peptide secretion	3/45	246/18870	0.0207714	0.118754	0.0828205	PFKM/SCT/NNAT	3
BP	GO:0019915	lipid storage	2/45	94/18870	0.0211543	0.120335	0.0839233	PLA2G4C/CIDEC	2
BP	GO:0042593	glucose homeostasis	3/45	251/18870	0.0218891	0.123892	0.0864043	PYGL/PFKM/ADIPOQ	3
BP	GO:0032410	negative regulation of transporter activity	2/45	98/18870	0.0228656	0.125605	0.0875987	CASQ2/PLN	2
BP	GO:0051588	regulation of neurotransmitter transport	2/45	99/18870	0.0233021	0.125605	0.0875987	CAMK2A/SYN1	2
BP	GO:0008627	intrinsic apoptotic signaling pathway in response to osmotic stress	1/45	10/18870	0.0235987	0.125605	0.0875987	YBX3	1
BP	GO:0014820	tonic smooth muscle contraction	1/45	10/18870	0.0235987	0.125605	0.0875987	GRIP2	1
BP	GO:0014866	skeletal myofibril assembly	1/45	10/18870	0.0235987	0.125605	0.0875987	ACTC1	1
BP	GO:0014889	muscle atrophy	1/45	10/18870	0.0235987	0.125605	0.0875987	TRIM63	1
BP	GO:0033034	positive regulation of myeloid cell apoptotic process	1/45	10/18870	0.0235987	0.125605	0.0875987	ADIPOQ	1
BP	GO:0090281	negative regulation of calcium ion import	1/45	10/18870	0.0235987	0.125605	0.0875987	PLN	1
BP	GO:0034766	negative regulation of monoatomic ion transmembrane transport	2/45	100/18870	0.0237421	0.125605	0.0875987	CASQ2/PLN	2
BP	GO:0071901	negative regulation of protein serine/threonine kinase activity	2/45	100/18870	0.0237421	0.125605	0.0875987	PKIA/ADIPOQ	2
BP	GO:0034612	response to tumor necrosis factor	3/45	259/18870	0.0237451	0.125605	0.0875987	YBX3/ANKRD1/ADIPOQ	3
BP	GO:0032755	positive regulation of interleukin-6 production	2/45	101/18870	0.0241855	0.125969	0.087853	IL1A/MAPK13	2
BP	GO:0015833	peptide transport	3/45	262/18870	0.0244626	0.125969	0.087853	PFKM/SCT/NNAT	3
BP	GO:0010906	regulation of glucose metabolic process	2/45	103/18870	0.0250824	0.125969	0.087853	ACADM/ADIPOQ	2
BP	GO:0001660	fever generation	1/45	11/18870	0.0259283	0.125969	0.087853	IL1A	1
BP	GO:0006002	fructose 6-phosphate metabolic process	1/45	11/18870	0.0259283	0.125969	0.087853	PFKM	1
BP	GO:0006734	NADH metabolic process	1/45	11/18870	0.0259283	0.125969	0.087853	GPD1L	1
BP	GO:0008611	ether lipid biosynthetic process	1/45	11/18870	0.0259283	0.125969	0.087853	PLA2G4C	1
BP	GO:0030157	pancreatic juice secretion	1/45	11/18870	0.0259283	0.125969	0.087853	SCT	1
BP	GO:0031953	negative regulation of protein autophosphorylation	1/45	11/18870	0.0259283	0.125969	0.087853	ADIPOQ	1
BP	GO:0034115	negative regulation of heterotypic cell-cell adhesion	1/45	11/18870	0.0259283	0.125969	0.087853	ADIPOQ	1
BP	GO:0036152	phosphatidylethanolamine acyl-chain remodeling	1/45	11/18870	0.0259283	0.125969	0.087853	PLA2G4C	1
BP	GO:0046504	glycerol ether biosynthetic process	1/45	11/18870	0.0259283	0.125969	0.087853	PLA2G4C	1
BP	GO:0060315	negative regulation of ryanodine-sensitive calcium-release channel activity	1/45	11/18870	0.0259283	0.125969	0.087853	CASQ2	1
BP	GO:0070587	regulation of cell-cell adhesion involved in gastrulation	1/45	11/18870	0.0259283	0.125969	0.087853	ADIPOQ	1
BP	GO:0071872	cellular response to epinephrine stimulus	1/45	11/18870	0.0259283	0.125969	0.087853	ADIPOQ	1
BP	GO:0072015	podocyte development	1/45	11/18870	0.0259283	0.125969	0.087853	ADIPOQ	1
BP	GO:0086070	SA node cell to atrial cardiac muscle cell communication	1/45	11/18870	0.0259283	0.125969	0.087853	SCN3B	1
BP	GO:0098887	neurotransmitter receptor transport, endosome to postsynaptic membrane	1/45	11/18870	0.0259283	0.125969	0.087853	GRIP2	1
BP	GO:0099639	neurotransmitter receptor transport, endosome to plasma membrane	1/45	11/18870	0.0259283	0.125969	0.087853	GRIP2	1
BP	GO:0019751	polyol metabolic process	2/45	109/18870	0.0278538	0.128174	0.0893902	GOT1/IP6K3	2
BP	GO:0006863	purine nucleobase transport	1/45	12/18870	0.0282526	0.128174	0.0893902	SLC25A4	1
BP	GO:0010459	negative regulation of heart rate	1/45	12/18870	0.0282526	0.128174	0.0893902	PLN	1
BP	GO:0010739	positive regulation of protein kinase A signaling	1/45	12/18870	0.0282526	0.128174	0.0893902	ADIPOQ	1
BP	GO:0015866	ADP transport	1/45	12/18870	0.0282526	0.128174	0.0893902	SLC25A4	1
BP	GO:0033083	regulation of immature T cell proliferation	1/45	12/18870	0.0282526	0.128174	0.0893902	IL1A	1
BP	GO:0033084	regulation of immature T cell proliferation in thymus	1/45	12/18870	0.0282526	0.128174	0.0893902	IL1A	1
BP	GO:0033540	fatty acid beta-oxidation using acyl-CoA oxidase	1/45	12/18870	0.0282526	0.128174	0.0893902	CRAT	1
BP	GO:0052646	alditol phosphate metabolic process	1/45	12/18870	0.0282526	0.128174	0.0893902	GPD1L	1
BP	GO:0060456	positive regulation of digestive system process	1/45	12/18870	0.0282526	0.128174	0.0893902	SCT	1
BP	GO:0070586	cell-cell adhesion involved in gastrulation	1/45	12/18870	0.0282526	0.128174	0.0893902	ADIPOQ	1
BP	GO:0072310	glomerular epithelial cell development	1/45	12/18870	0.0282526	0.128174	0.0893902	ADIPOQ	1
BP	GO:0097384	cellular lipid biosynthetic process	1/45	12/18870	0.0282526	0.128174	0.0893902	PLA2G4C	1
BP	GO:1900121	negative regulation of receptor binding	1/45	12/18870	0.0282526	0.128174	0.0893902	ADIPOQ	1
BP	GO:1901503	ether biosynthetic process	1/45	12/18870	0.0282526	0.128174	0.0893902	PLA2G4C	1
BP	GO:0008637	apoptotic mitochondrial changes	2/45	110/18870	0.0283272	0.128174	0.0893902	SLC25A4/CAMK2A	2
BP	GO:0050804	modulation of chemical synaptic transmission	4/45	489/18870	0.0287553	0.128174	0.0893902	SCT/CAMK2A/SYN1/ADIPOQ	4
BP	GO:0071347	cellular response to interleukin-1	2/45	111/18870	0.0288039	0.128174	0.0893902	MAPK13/ANKRD1	2
BP	GO:1905954	positive regulation of lipid localization	2/45	111/18870	0.0288039	0.128174	0.0893902	IL1A/ADIPOQ	2
BP	GO:0099177	regulation of trans-synaptic signaling	4/45	490/18870	0.0289425	0.128174	0.0893902	SCT/CAMK2A/SYN1/ADIPOQ	4
BP	GO:0031667	response to nutrient levels	4/45	495/18870	0.0298896	0.128174	0.0893902	IL1A/ACADM/SCT/ADIPOQ	4
BP	GO:0001696	gastric acid secretion	1/45	13/18870	0.0305714	0.128174	0.0893902	SCT	1
BP	GO:0002024	diet induced thermogenesis	1/45	13/18870	0.0305714	0.128174	0.0893902	SCT	1
BP	GO:0005513	detection of calcium ion	1/45	13/18870	0.0305714	0.128174	0.0893902	CASQ2	1
BP	GO:0010642	negative regulation of platelet-derived growth factor receptor signaling pathway	1/45	13/18870	0.0305714	0.128174	0.0893902	ADIPOQ	1
BP	GO:0014874	response to stimulus involved in regulation of muscle adaptation	1/45	13/18870	0.0305714	0.128174	0.0893902	TRIM63	1
BP	GO:0015851	nucleobase transport	1/45	13/18870	0.0305714	0.128174	0.0893902	SLC25A4	1
BP	GO:0032306	regulation of prostaglandin secretion	1/45	13/18870	0.0305714	0.128174	0.0893902	IL1A	1
BP	GO:0032308	positive regulation of prostaglandin secretion	1/45	13/18870	0.0305714	0.128174	0.0893902	IL1A	1
BP	GO:0033080	immature T cell proliferation in thymus	1/45	13/18870	0.0305714	0.128174	0.0893902	IL1A	1
BP	GO:0043650	dicarboxylic acid biosynthetic process	1/45	13/18870	0.0305714	0.128174	0.0893902	GOT1	1
BP	GO:0051280	negative regulation of release of sequestered calcium ion into cytosol	1/45	13/18870	0.0305714	0.128174	0.0893902	CASQ2	1
BP	GO:0070278	extracellular matrix constituent secretion	1/45	13/18870	0.0305714	0.128174	0.0893902	TMEM38B	1
BP	GO:0098693	regulation of synaptic vesicle cycle	1/45	13/18870	0.0305714	0.128174	0.0893902	SYN1	1
BP	GO:0106049	regulation of cellular response to osmotic stress	1/45	13/18870	0.0305714	0.128174	0.0893902	YBX3	1
BP	GO:1901862	negative regulation of muscle tissue development	1/45	13/18870	0.0305714	0.128174	0.0893902	YBX3	1
BP	GO:0007548	sex differentiation	3/45	288/18870	0.0311715	0.130207	0.0908084	YBX3/IL1A/ASB1	3
BP	GO:0072659	protein localization to plasma membrane	3/45	290/18870	0.0317239	0.131094	0.0914267	ADIPOQ/SCN3B/GRIP2	3
BP	GO:1904659	glucose transmembrane transport	2/45	117/18870	0.0317312	0.131094	0.0914267	CLTCL1/ADIPOQ	2
BP	GO:2000278	regulation of DNA biosynthetic process	2/45	117/18870	0.0317312	0.131094	0.0914267	ANKRD1/ADIPOQ	2
BP	GO:0010745	negative regulation of macrophage derived foam cell differentiation	1/45	14/18870	0.0328849	0.132476	0.0923905	ADIPOQ	1
BP	GO:0036151	phosphatidylcholine acyl-chain remodeling	1/45	14/18870	0.0328849	0.132476	0.0923905	PLA2G4C	1
BP	GO:0060457	negative regulation of digestive system process	1/45	14/18870	0.0328849	0.132476	0.0923905	SCT	1
BP	GO:0071871	response to epinephrine	1/45	14/18870	0.0328849	0.132476	0.0923905	ADIPOQ	1
BP	GO:0140042	lipid droplet formation	1/45	14/18870	0.0328849	0.132476	0.0923905	PLA2G4C	1
BP	GO:1901029	negative regulation of mitochondrial outer membrane permeabilization involved in apoptotic signaling pathway	1/45	14/18870	0.0328849	0.132476	0.0923905	SLC25A4	1
BP	GO:1901077	regulation of relaxation of muscle	1/45	14/18870	0.0328849	0.132476	0.0923905	PLN	1
BP	GO:0018105	peptidyl-serine phosphorylation	3/45	295/18870	0.0331275	0.132481	0.0923942	MAPK13/GPD1L/CAMK2A	3
BP	GO:0007006	mitochondrial membrane organization	2/45	120/18870	0.0332373	0.132481	0.0923942	SLC25A4/CAMK2A	2
BP	GO:0008645	hexose transmembrane transport	2/45	120/18870	0.0332373	0.132481	0.0923942	CLTCL1/ADIPOQ	2
BP	GO:0051100	negative regulation of binding	2/45	121/18870	0.0337455	0.134035	0.0934777	PLN/ADIPOQ	2
BP	GO:0015749	monosaccharide transmembrane transport	2/45	123/18870	0.034771	0.134136	0.0935484	CLTCL1/ADIPOQ	2
BP	GO:0007567	parturition	1/45	15/18870	0.0351929	0.134136	0.0935484	PLA2G4C	1
BP	GO:0010649	regulation of cell communication by electrical coupling	1/45	15/18870	0.0351929	0.134136	0.0935484	CASQ2	1
BP	GO:0042308	negative regulation of protein import into nucleus	1/45	15/18870	0.0351929	0.134136	0.0935484	PKIA	1
BP	GO:0043950	positive regulation of cAMP-mediated signaling	1/45	15/18870	0.0351929	0.134136	0.0935484	SCT	1
BP	GO:0051284	positive regulation of sequestering of calcium ion	1/45	15/18870	0.0351929	0.134136	0.0935484	CASQ2	1
BP	GO:0060009	Sertoli cell development	1/45	15/18870	0.0351929	0.134136	0.0935484	IL1A	1
BP	GO:0071639	positive regulation of monocyte chemotactic protein-1 production	1/45	15/18870	0.0351929	0.134136	0.0935484	ADIPOQ	1
BP	GO:0072350	tricarboxylic acid metabolic process	1/45	15/18870	0.0351929	0.134136	0.0935484	IDH2	1
BP	GO:0090209	negative regulation of triglyceride metabolic process	1/45	15/18870	0.0351929	0.134136	0.0935484	CIDEC	1
BP	GO:1903599	positive regulation of autophagy of mitochondrion	1/45	15/18870	0.0351929	0.134136	0.0935484	SLC25A4	1
BP	GO:2000767	positive regulation of cytoplasmic translation	1/45	15/18870	0.0351929	0.134136	0.0935484	YBX3	1
BP	GO:0001933	negative regulation of protein phosphorylation	3/45	304/18870	0.0357352	0.135746	0.094671	GPD1L/PKIA/ADIPOQ	3
BP	GO:0051146	striated muscle cell differentiation	3/45	305/18870	0.0360313	0.136171	0.0949678	ACTC1/ANKRD1/ACADM	3
BP	GO:0006575	cellular modified amino acid metabolic process	2/45	126/18870	0.0363321	0.136171	0.0949678	CRAT/ACADM	2
BP	GO:0046683	response to organophosphorus	2/45	127/18870	0.0368584	0.136171	0.0949678	ADIPOQ/P2RX6	2
BP	GO:0006874	intracellular calcium ion homeostasis	3/45	308/18870	0.0369274	0.136171	0.0949678	CASQ2/TMEM38B/PLN	3
BP	GO:0018209	peptidyl-serine modification	3/45	308/18870	0.0369274	0.136171	0.0949678	MAPK13/GPD1L/CAMK2A	3
BP	GO:0030852	regulation of granulocyte differentiation	1/45	16/18870	0.0374955	0.136171	0.0949678	ADIPOQ	1
BP	GO:0033275	actin-myosin filament sliding	1/45	16/18870	0.0374955	0.136171	0.0949678	ACTC1	1
BP	GO:0043517	positive regulation of DNA damage response, signal transduction by p53 class mediator	1/45	16/18870	0.0374955	0.136171	0.0949678	ANKRD1	1
BP	GO:0046459	short-chain fatty acid metabolic process	1/45	16/18870	0.0374955	0.136171	0.0949678	CRAT	1
BP	GO:0047484	regulation of response to osmotic stress	1/45	16/18870	0.0374955	0.136171	0.0949678	YBX3	1
BP	GO:0097091	synaptic vesicle clustering	1/45	16/18870	0.0374955	0.136171	0.0949678	SYN1	1
BP	GO:0098969	neurotransmitter receptor transport to postsynaptic membrane	1/45	16/18870	0.0374955	0.136171	0.0949678	GRIP2	1
BP	GO:1901524	regulation of mitophagy	1/45	16/18870	0.0374955	0.136171	0.0949678	SLC25A4	1
BP	GO:0071375	cellular response to peptide hormone stimulus	3/45	310/18870	0.0375313	0.136171	0.0949678	GOT1/CAMK2A/ADIPOQ	3
BP	GO:0051224	negative regulation of protein transport	2/45	129/18870	0.0379199	0.137141	0.0956445	PKIA/ADIPOQ	2
BP	GO:0055007	cardiac muscle cell differentiation	2/45	131/18870	0.0389931	0.138601	0.0966627	ACTC1/ACADM	2
BP	GO:0009068	aspartate family amino acid catabolic process	1/45	17/18870	0.0397928	0.138601	0.0966627	GOT1	1
BP	GO:0031649	heat generation	1/45	17/18870	0.0397928	0.138601	0.0966627	IL1A	1
BP	GO:0032310	prostaglandin secretion	1/45	17/18870	0.0397928	0.138601	0.0966627	IL1A	1
BP	GO:0032780	negative regulation of ATP-dependent activity	1/45	17/18870	0.0397928	0.138601	0.0966627	PLN	1
BP	GO:0055089	fatty acid homeostasis	1/45	17/18870	0.0397928	0.138601	0.0966627	GOT1	1
BP	GO:0055119	relaxation of cardiac muscle	1/45	17/18870	0.0397928	0.138601	0.0966627	PLN	1
BP	GO:0072224	metanephric glomerulus development	1/45	17/18870	0.0397928	0.138601	0.0966627	ADIPOQ	1
BP	GO:0098877	neurotransmitter receptor transport to plasma membrane	1/45	17/18870	0.0397928	0.138601	0.0966627	GRIP2	1
BP	GO:0099638	endosome to plasma membrane protein transport	1/45	17/18870	0.0397928	0.138601	0.0966627	GRIP2	1
BP	GO:1900120	regulation of receptor binding	1/45	17/18870	0.0397928	0.138601	0.0966627	ADIPOQ	1
BP	GO:1903540	establishment of protein localization to postsynaptic membrane	1/45	17/18870	0.0397928	0.138601	0.0966627	GRIP2	1
BP	GO:0043271	negative regulation of monoatomic ion transport	2/45	133/18870	0.0400778	0.13874	0.0967597	CASQ2/PLN	2
BP	GO:1904950	negative regulation of establishment of protein localization	2/45	133/18870	0.0400778	0.13874	0.0967597	PKIA/ADIPOQ	2
BP	GO:0030198	extracellular matrix organization	3/45	321/18870	0.0409432	0.140946	0.0982982	SERPINB5/TMEM38B/VIT	3
BP	GO:0043062	extracellular structure organization	3/45	322/18870	0.041261	0.140946	0.0982982	SERPINB5/TMEM38B/VIT	3
BP	GO:0045229	external encapsulating structure organization	3/45	323/18870	0.0415801	0.140946	0.0982982	SERPINB5/TMEM38B/VIT	3
BP	GO:0034219	carbohydrate transmembrane transport	2/45	136/18870	0.0417264	0.140946	0.0982982	CLTCL1/ADIPOQ	2
BP	GO:0006735	NADH regeneration	1/45	18/18870	0.0420847	0.140946	0.0982982	PFKM	1
BP	GO:0043649	dicarboxylic acid catabolic process	1/45	18/18870	0.0420847	0.140946	0.0982982	GOT1	1
BP	GO:0061621	canonical glycolysis	1/45	18/18870	0.0420847	0.140946	0.0982982	PFKM	1
BP	GO:0061718	glucose catabolic process to pyruvate	1/45	18/18870	0.0420847	0.140946	0.0982982	PFKM	1
BP	GO:0071243	cellular response to arsenic-containing substance	1/45	18/18870	0.0420847	0.140946	0.0982982	MAPK13	1
BP	GO:0086103	G protein-coupled receptor signaling pathway involved in heart process	1/45	18/18870	0.0420847	0.140946	0.0982982	PLN	1
BP	GO:0090036	regulation of protein kinase C signaling	1/45	18/18870	0.0420847	0.140946	0.0982982	GPD1L	1
BP	GO:0042326	negative regulation of phosphorylation	3/45	327/18870	0.0428688	0.142694	0.0995169	GPD1L/PKIA/ADIPOQ	3
BP	GO:0043467	regulation of generation of precursor metabolites and energy	2/45	139/18870	0.0434004	0.142694	0.0995169	PPP1R3C/PPP1R3F	2
BP	GO:0048545	response to steroid hormone	3/45	330/18870	0.0438486	0.142694	0.0995169	GOT1/TRIM63/ADIPOQ	3
BP	GO:0055074	calcium ion homeostasis	3/45	331/18870	0.0441777	0.142694	0.0995169	CASQ2/TMEM38B/PLN	3
BP	GO:0010663	positive regulation of striated muscle cell apoptotic process	1/45	19/18870	0.0443713	0.142694	0.0995169	CAMK2A	1
BP	GO:0010666	positive regulation of cardiac muscle cell apoptotic process	1/45	19/18870	0.0443713	0.142694	0.0995169	CAMK2A	1
BP	GO:0015867	ATP transport	1/45	19/18870	0.0443713	0.142694	0.0995169	SLC25A4	1
BP	GO:0032305	positive regulation of icosanoid secretion	1/45	19/18870	0.0443713	0.142694	0.0995169	IL1A	1
BP	GO:0038166	angiotensin-activated signaling pathway	1/45	19/18870	0.0443713	0.142694	0.0995169	CAMK2A	1
BP	GO:0045721	negative regulation of gluconeogenesis	1/45	19/18870	0.0443713	0.142694	0.0995169	ADIPOQ	1
BP	GO:0055003	cardiac myofibril assembly	1/45	19/18870	0.0443713	0.142694	0.0995169	ACTC1	1
BP	GO:0086014	atrial cardiac muscle cell action potential	1/45	19/18870	0.0443713	0.142694	0.0995169	SCN3B	1
BP	GO:0086026	atrial cardiac muscle cell to AV node cell signaling	1/45	19/18870	0.0443713	0.142694	0.0995169	SCN3B	1
BP	GO:0086066	atrial cardiac muscle cell to AV node cell communication	1/45	19/18870	0.0443713	0.142694	0.0995169	SCN3B	1
BP	GO:0071214	cellular response to abiotic stimulus	3/45	334/18870	0.0451725	0.144291	0.100631	YBX3/MAPK13/ANKRD1	3
BP	GO:0104004	cellular response to environmental stimulus	3/45	334/18870	0.0451725	0.144291	0.100631	YBX3/MAPK13/ANKRD1	3
BP	GO:0032386	regulation of intracellular transport	3/45	336/18870	0.0458419	0.144291	0.100631	PKIA/PLN/ADIPOQ	3
BP	GO:0007269	neurotransmitter secretion	2/45	144/18870	0.0462454	0.144291	0.100631	CAMK2A/SYN1	2
BP	GO:0034763	negative regulation of transmembrane transport	2/45	144/18870	0.0462454	0.144291	0.100631	CASQ2/PLN	2
BP	GO:0099643	signal release from synapse	2/45	144/18870	0.0462454	0.144291	0.100631	CAMK2A/SYN1	2
BP	GO:0006071	glycerol metabolic process	1/45	20/18870	0.0466525	0.144291	0.100631	GOT1	1
BP	GO:0010738	regulation of protein kinase A signaling	1/45	20/18870	0.0466525	0.144291	0.100631	ADIPOQ	1
BP	GO:0032098	regulation of appetite	1/45	20/18870	0.0466525	0.144291	0.100631	SCT	1
BP	GO:0032303	regulation of icosanoid secretion	1/45	20/18870	0.0466525	0.144291	0.100631	IL1A	1
BP	GO:0035795	negative regulation of mitochondrial membrane permeability	1/45	20/18870	0.0466525	0.144291	0.100631	SLC25A4	1
BP	GO:0061620	glycolytic process through glucose-6-phosphate	1/45	20/18870	0.0466525	0.144291	0.100631	PFKM	1
BP	GO:0071474	cellular hyperosmotic response	1/45	20/18870	0.0466525	0.144291	0.100631	YBX3	1
BP	GO:0097709	connective tissue replacement	1/45	20/18870	0.0466525	0.144291	0.100631	IL1A	1
BP	GO:0046165	alcohol biosynthetic process	2/45	145/18870	0.0468225	0.144423	0.100722	GOT1/IP6K3	2
BP	GO:0001508	action potential	2/45	146/18870	0.0474023	0.145025	0.101143	GPD1L/SCN3B	2
BP	GO:0046434	organophosphate catabolic process	2/45	146/18870	0.0474023	0.145025	0.101143	GPD1L/PLA2G4C	2
BP	GO:0051053	negative regulation of DNA metabolic process	2/45	146/18870	0.0474023	0.145025	0.101143	ANKRD1/ADIPOQ	2
BP	GO:0006067	ethanol metabolic process	1/45	21/18870	0.0489284	0.145755	0.101652	ADH1B	1
BP	GO:0006662	glycerol ether metabolic process	1/45	21/18870	0.0489284	0.145755	0.101652	PLA2G4C	1
BP	GO:0009067	aspartate family amino acid biosynthetic process	1/45	21/18870	0.0489284	0.145755	0.101652	GOT1	1
BP	GO:0046485	ether lipid metabolic process	1/45	21/18870	0.0489284	0.145755	0.101652	PLA2G4C	1
BP	GO:0050765	negative regulation of phagocytosis	1/45	21/18870	0.0489284	0.145755	0.101652	ADIPOQ	1
BP	GO:0061318	renal filtration cell differentiation	1/45	21/18870	0.0489284	0.145755	0.101652	ADIPOQ	1
BP	GO:0071605	monocyte chemotactic protein-1 production	1/45	21/18870	0.0489284	0.145755	0.101652	ADIPOQ	1
BP	GO:0071637	regulation of monocyte chemotactic protein-1 production	1/45	21/18870	0.0489284	0.145755	0.101652	ADIPOQ	1
BP	GO:0072112	podocyte differentiation	1/45	21/18870	0.0489284	0.145755	0.101652	ADIPOQ	1
BP	GO:2000010	positive regulation of protein localization to cell surface	1/45	21/18870	0.0489284	0.145755	0.101652	GPD1L	1
BP	GO:0008584	male gonad development	2/45	150/18870	0.049748	0.147421	0.102813	YBX3/IL1A	2
BP	GO:0010508	positive regulation of autophagy	2/45	150/18870	0.049748	0.147421	0.102813	HSPB8/SLC25A4	2
CC	GO:0000164	protein phosphatase type 1 complex	2/45	19/19886	0.000835504	0.0128459	0.010114	PPP1R3C/PPP1R3F	2
CC	GO:0008287	protein serine/threonine phosphatase complex	2/45	52/19886	0.00617899	0.0724254	0.057023	PPP1R3C/PPP1R3F	2
CC	GO:0044309	neuron spine	3/45	176/19886	0.00736352	0.0724254	0.057023	CAMK2A/P2RX6/GRIP2	3
CC	GO:0099572	postsynaptic specialization	4/45	346/19886	0.00765472	0.0724254	0.057023	CAMK2A/SYN1/P2RX6/GRIP2	4
CC	GO:0005811	lipid droplet	2/45	104/19886	0.0231735	0.17812	0.14024	PLA2G4C/CIDEC	2
CC	GO:0005759	mitochondrial matrix	4/45	487/19886	0.0240038	0.17812	0.14024	IDH2/ACADM/DGLUCY/ETFDH	4
CC	GO:0005614	interstitial matrix	1/45	11/19886	0.0246183	0.17812	0.14024	VIT	1
CC	GO:0098850	extrinsic component of synaptic vesicle membrane	1/45	11/19886	0.0246183	0.17812	0.14024	SYN1	1
CC	GO:0005884	actin filament	2/45	118/19886	0.0292791	0.185156	0.145779	ACTC1/SMTNL2	2
CC	GO:0001518	voltage-gated sodium channel complex	1/45	14/19886	0.0312288	0.185156	0.145779	SCN3B	1
CC	GO:0099092	postsynaptic density, intracellular component	1/45	14/19886	0.0312288	0.185156	0.145779	GRIP2	1
CC	GO:0014069	postsynaptic density	3/45	315/19886	0.0342562	0.185156	0.145779	CAMK2A/SYN1/GRIP2	3
CC	GO:0032279	asymmetric synapse	3/45	331/19886	0.0387916	0.185156	0.145779	CAMK2A/SYN1/GRIP2	3
CC	GO:0030130	clathrin coat of trans-Golgi network vesicle	1/45	18/19886	0.0399748	0.185156	0.145779	CLTCL1	1
CC	GO:0099091	postsynaptic specialization, intracellular component	1/45	18/19886	0.0399748	0.185156	0.145779	GRIP2	1
CC	GO:0005777	peroxisome	2/45	143/19886	0.0415668	0.185156	0.145779	IDH2/CRAT	2
CC	GO:0042579	microbody	2/45	143/19886	0.0415668	0.185156	0.145779	IDH2/CRAT	2
CC	GO:0090533	cation-transporting ATPase complex	1/45	19/19886	0.0421493	0.185156	0.145779	PLN	1
CC	GO:0098688	parallel fiber to Purkinje cell synapse	1/45	19/19886	0.0421493	0.185156	0.145779	P2RX6	1
CC	GO:0012510	trans-Golgi network transport vesicle membrane	1/45	20/19886	0.0443188	0.187973	0.147998	CLTCL1	1
CC	GO:0098984	neuron to neuron synapse	3/45	362/19886	0.0484088	0.193005	0.15196	CAMK2A/SYN1/GRIP2	3
MF	GO:0030247	polysaccharide binding	2/46	25/18496	0.00175038	0.0752662	0.0580388	PPP1R3C/PPP1R3F	2
MF	GO:0016616	oxidoreductase activity, acting on the CH-OH group of donors, NAD or NADP as acceptor	3/46	125/18496	0.00370076	0.100124	0.0772071	IDH2/GPD1L/ADH1B	3
MF	GO:0017080	sodium channel regulator activity	2/46	39/18496	0.00422885	0.100124	0.0772071	GPD1L/SCN3B	2
MF	GO:0016614	oxidoreductase activity, acting on CH-OH group of donors	3/46	135/18496	0.00459027	0.100124	0.0772071	IDH2/GPD1L/ADH1B	3
MF	GO:0030246	carbohydrate binding	4/46	273/18496	0.00465694	0.100124	0.0772071	PYGL/PFKM/PPP1R3C/PPP1R3F	4
MF	GO:0035254	glutamate receptor binding	2/46	44/18496	0.00535636	0.102366	0.0789359	CAMK2A/GRIP2	2
MF	GO:0051287	NAD binding	2/46	53/18496	0.00769253	0.11714	0.090328	IDH2/GPD1L	2
MF	GO:0070279	vitamin B6 binding	2/46	57/18496	0.00885358	0.11714	0.090328	PYGL/GOT1	2
MF	GO:0016627	oxidoreductase activity, acting on the CH-CH group of donors	2/46	60/18496	0.00977259	0.120063	0.0925824	CRAT/ACADM	2
MF	GO:0048029	monosaccharide binding	2/46	75/18496	0.0149647	0.16087	0.124049	PYGL/PFKM	2
MF	GO:0048306	calcium-dependent protein binding	2/46	79/18496	0.0165109	0.167052	0.128816	CASQ2/SYN1	2
MF	GO:0050660	flavin adenine dinucleotide binding	2/46	88/18496	0.0202269	0.168836	0.130191	ACADM/ETFDH	2
MF	GO:0004862	cAMP-dependent protein kinase inhibitor activity	1/46	10/18496	0.0245997	0.168836	0.130191	PKIA	1
MF	GO:0005345	purine nucleobase transmembrane transporter activity	1/46	10/18496	0.0245997	0.168836	0.130191	SLC25A4	1
MF	GO:0016634	oxidoreductase activity, acting on the CH-CH group of donors, oxygen as acceptor	1/46	10/18496	0.0245997	0.168836	0.130191	CRAT	1
MF	GO:0018455	alcohol dehydrogenase [NAD(P)+] activity	1/46	10/18496	0.0245997	0.168836	0.130191	ADH1B	1
MF	GO:0032052	bile acid binding	1/46	10/18496	0.0245997	0.168836	0.130191	PYGL	1
MF	GO:0005536	glucose binding	1/46	11/18496	0.0270268	0.168836	0.130191	PYGL	1
MF	GO:0015205	nucleobase transmembrane transporter activity	1/46	11/18496	0.0270268	0.168836	0.130191	SLC25A4	1
MF	GO:0015217	ADP transmembrane transporter activity	1/46	11/18496	0.0270268	0.168836	0.130191	SLC25A4	1
MF	GO:0102545	phosphatidyl phospholipase B activity	1/46	11/18496	0.0270268	0.168836	0.130191	PLA2G4C	1
MF	GO:0003995	acyl-CoA dehydrogenase activity	1/46	12/18496	0.0294481	0.168836	0.130191	ACADM	1
MF	GO:0008603	cAMP-dependent protein kinase regulator activity	1/46	12/18496	0.0294481	0.168836	0.130191	PKIA	1
MF	GO:0052890	oxidoreductase activity, acting on the CH-CH group of donors, with a flavin as acceptor	1/46	12/18496	0.0294481	0.168836	0.130191	ACADM	1
MF	GO:0005347	ATP transmembrane transporter activity	1/46	13/18496	0.0318634	0.171266	0.132065	SLC25A4	1
MF	GO:0034236	protein kinase A catalytic subunit binding	1/46	13/18496	0.0318634	0.171266	0.132065	PKIA	1
MF	GO:0048038	quinone binding	1/46	16/18496	0.0390743	0.173364	0.133683	ETFDH	1
MF	GO:0005179	hormone activity	2/46	126/18496	0.0392155	0.173364	0.133683	SCT/ADIPOQ	2
MF	GO:0047498	calcium-dependent phospholipase A2 activity	1/46	17/18496	0.0414662	0.173364	0.133683	PLA2G4C	1
MF	GO:0044325	transmembrane transporter binding	2/46	133/18496	0.0432392	0.173364	0.133683	GPD1L/SCN3B	2
MF	GO:0099106	ion channel regulator activity	2/46	134/18496	0.0438263	0.173364	0.133683	GPD1L/SCN3B	2
MF	GO:0008970	phospholipase A1 activity	1/46	18/18496	0.0438523	0.173364	0.133683	PLA2G4C	1
MF	GO:0016247	channel regulator activity	2/46	139/18496	0.0468059	0.173364	0.133683	GPD1L/SCN3B	2
MF	GO:0001614	purinergic nucleotide receptor activity	1/46	20/18496	0.048607	0.173364	0.133683	P2RX6	1
MF	GO:0004745	NAD-retinol dehydrogenase activity	1/46	20/18496	0.048607	0.173364	0.133683	ADH1B	1
MF	GO:0005261	monoatomic cation channel activity	3/46	333/18496	0.0497385	0.173364	0.133683	TMEM38B/P2RX6/SCN3B	3
